# Supplementary material
Source: publisher figshare collection journal article supplement (https://frontiersin.figshare.com/ndownloader/files/28294413)
Supplement: Supplementary file [file 28294413]

## SUPPLEMENTARY MATERIAL

Table 1. Study questionnaire

|                  |
|------------------|
| DEMOGRAPHIC DATA |
|------------------|

1. Sex:      male ☐                      female ☐
2. Place of work: a) Public hospital ☐   b) Private hospital ☐
3. Medical speciality/subspecialty:    α) Neonatologist ☐   β) Trainee neonatologists ☐   γ) Pediatrician working in a NICU ☐
4. Years of working in the NICU: .....

|                         |
|-------------------------|
| Physician's perceptions |
|-------------------------|

5. Do you believe that neonates are capable of feeling pain?  
     YES ☐                      NO ☐
6. Do you believe that pain may have adverse effects in the neonate?  
     YES ☐                      NO ☐
7. Is there a protocol for sedation and analgesia in your department?  
     YES ☐                      NO ☐
8. Regardless of the NICU policy, you consider the administration of sedation-analgesia to neonates undergoing painful/stressful procedures as:  
     a) necessary ☐      b) important ☐      c) not needed ☐

|                       |
|-----------------------|
| Physician's practices |
|-----------------------|

- 9.A. Do you use analgesia in neonates following major surgeries?  
     YES ☐                      NO ☐
- 9.B. If yes, which analgesic?  
     a) morphine ☐                      c) meperidine (pethidine) ☐  
     b) fentanyl ☐                      d) paracetamol ☐  
     ε) other (define) .....
- 10.A. Do you use sedation – analgesia to neonates receiving mechanical ventilation :  
     a) never ☐      β) in special occasions ☐      c) often ☐      d) always ☐  
     If the answer is the (b), please identify the special cases: .....  
     .....
- 10.B. If you use medication during mechanical ventilation, which of the following do you use?  
     a) morphine ☐                      e) diazepam ☐  
     b) fentanyl ☐                      f) phenobarbital ☐  
     c) midazolam ☐                      g) chloral hydrate ☐  
     d) lorazepam ☐                      h) other (define) .....
11. If you use medication postoperatively or during mechanical ventilation, which way of administration do you prefer?  
     a) standard intervals ☐  
     b) continuous infusion ☐  
     c) on demand ☐

12.A. Do you administer muscle relaxants during mechanical ventilation?

- a) never ☐ b) rarely ☐ c) often ☐ d) always ☐

12.B. If yes, which muscle relaxant do you use?

- a) pancuronium (Pavulon) ☐ c) vecuronium (Norcuron) ☐  
b) atracurium (Tracrium) ☐ d) other (define) .....

12.C. If you administer muscle relaxant to neonates on mechanical ventilation:

- a) do you use a sedative and/or analgesic along with the muscle relaxant? ☐  
b) do you believe that there is no need of sedative and/or analgesic use with muscle relaxant? ☐

13.A. Do you use a sedative or analgesic prior to non-emergent intubation? YES ☐ NO ☐

13.B. If yes, which of the following?

- a) morphine ☐ f) diazepam ☐  
b) fentanyl ☐ g) phenobarbital ☐  
c) paracetamol ☐ h) chloral hydrate ☐  
d) midazolam ☐ i) other (define) .....  
e) Ketamine ☐

13.C. Do you use a muscle relaxant prior to non-emergent intubation? YES ☐ NO ☐

13.D. If yes, which relaxant?

- a) pancuronium (Pavulon) ☐ c) vecuronium (Norcuron) ☐  
b) atracurium (Tracrium) ☐ d) other (define) .....

14.A. Do you use systemic analgesia/sedation during chest drainage?.

YES ☐ NO ☐

14.B. If yes, which of the following?

- a) morphine ☐ e) midazolam ☐  
b) fentanyl ☐ f) diazepam ☐  
c) paracetamol ☐ g) phenobarbital ☐  
d) chloral hydrate ☐ h) sedation ☐  
i) other (define) .....

15. Do you use systemic analgesia/sedation or local anesthesia prior to or during the following painful procedures? If yes, please define.

- a) Lumbar puncture: YES ☐ (define ..... ) NO ☐  
b) Peripheral arterial line placement: YES ☐ (define ..... ) NO ☐  
c) Endotracheal suction: YES ☐ (define ..... ) NO ☐  
d) Chest tube placement: YES ☐ (define ..... ) NO ☐  
e) Suprapubic paracentesis: YES ☐ (define ..... ) NO ☐  
f) Venous puncture: YES ☐ (define ..... ) NO ☐  
g) Heel prick: YES ☐ (define ..... ) NO ☐  
h) Other procedures (define ..... )

16.A. Do you use non-pharmacological means to alleviate pain and discomfort prior to or during minor painful or stressful procedures?

YES ☐ NO ☐

16.B. If yes, which of the following non-pharmacological means do you use?

- a) minimization of procedures and handling of the neonates ☐  
b) decrease of the light and noise in the NICU ☐  
c) tactile stimulation ☐  
d) skin to skin contact ☐  
e) use of non-nutritive sucking (pacifier) ☐  
f) sweet solutions orally ☐  
g) other (define) .....

17.A. Do you use neonatal pain assessment tools? YES ☐ NO ☐

17.B. If yes, who performs the assessment? doctor ☐ nurse ☐

17.C. If yes, please indicate which of the following neonatal pain assessment scales you use:

- a) NIPS (Neonatal Infant Pain Scale) ☐
- b) PIPP (Premature Infant Pain Profile) ☐
- c) COMFORT ☐
- d) N-PASS (Neonatal Pain Agitation & Sedation Scale) ☐
- e) EDIN (Echelle Douleur Inconfort Nouveau-Ne) ☐
- f) DAN (Douleur Algu du Nouveau-Ne) ☐
- g) CRIES (Cry, Requires oxygen, Increased vital signs, Expressions, Sleeplessness) ☐
- h) NFCS (Neonatal Facial Coding System) ☐
- i) other (define) .....

|                                                |
|------------------------------------------------|
| Educational sources & respondent's suggestions |
|------------------------------------------------|

18. If your view is that neonates need sedation-analgesia, which sources of information contributed to this end.

- a) International literature ☐
- b) Greek literature ☐
- c) Lectures at international congresses ☐
- d) Lectures at Greek congresses ☐
- e) Lectures in the NICU ☐
- f) Discussions during daily ward rounds ☐
- g) other (define).....

19.A. Do you think that further education of Greek neonatologists on neonatal pain management is required?

YES ☐, NO ☐

19.B. If yes, what would you suggest? .....

.....

|                  |
|------------------|
| Further comments |
|------------------|

.....  
.....  
.....  
.....  
.....  
.....  
.....

Supplementary Table 2. Independent association of the time-point with the use of analgesia – sedation and non-pharmacological measures for neonatal pain, after adjustment for physicians' sex and working years in neonatal intensive care unit.

| Dependent variables             | Independent variables <sup>a</sup> | p     | Exp(B) | 95% CI for Exp(B) |        |
|---------------------------------|------------------------------------|-------|--------|-------------------|--------|
|                                 |                                    |       |        | Lower             | Upper  |
| A-S post-operationally          | T-P                                | 0.137 | 5.431  | 0.584             | 50.536 |
| A-S during MV                   | T-P                                | 0.006 | 0.159  | 0.043             | 0.590  |
| A-S for non-emergent intubation | T-P                                | 0.053 | 0.511  | 0.258             | 1.010  |
| A-S for other procedures        | T-P                                | 0.030 | 0.377  | 0.156             | 0.910  |
| Local anesthetics               | T-P                                | 0.000 | 0.062  | 0.030             | 0.129  |
| Non-pharmacological approaches  | T-P                                | 0.006 | 6.091  | 1.659             | 22.361 |
| Sweet solutions                 | T-P                                | 0.000 | 9.353  | 4.707             | 18.583 |

<sup>a</sup> The physicians' sex and working years in NICU were not significantly associated with any dependent variable; A-S, analgesics – sedatives; MV, mechanical ventilation; NICU, neonatal intensive care unit; T-P, time-point

Supplementary Table 3. Factors independently associated with the use of analgesia – sedation during mechanical ventilation. The time-point, physicians' sex, and working years in neonatal intensive care unit entered the model as independent variables.

| Dependent variables  | Independent variables <sup>a</sup> | p     | Exp(B) | 95% CI for Exp(B) |        |
|----------------------|------------------------------------|-------|--------|-------------------|--------|
|                      |                                    |       |        | Lower             | Upper  |
| Opioids              | T-P                                | 0.000 | 5.727  | 2.389             | 13.727 |
|                      | Years in NICU                      | 0.042 | 1.057  | 1.002             | 1.115  |
| <i>Morphine</i>      | T-P                                | 0.154 | 0.603  | 0.301             | 1.208  |
|                      | Sex                                | 0.031 | 2.231  | 1.075             | 4.632  |
| <i>Fentanyl</i>      | T-P                                | 0.000 | 10.291 | 4.881             | 21.696 |
| Paracetamol          | T-P                                | 0.001 | 2.887  | 1.570             | 5.307  |
| General anesthetics  | T-P                                | 0.020 | 6.131  | 1.333             | 28.192 |
| Sedation             | T-P                                | 0.021 | 2.015  | 1.111             | 3.653  |
| <i>Midazolam</i>     | T-P                                | 0.000 | 4.570  | 2.368             | 8.821  |
|                      | Years in NICU                      | 0.019 | 1.048  | 1.008             | 1.089  |
| <i>Diazepam</i>      | T-P                                | 0.340 | 0.587  | 0.196             | 1.754  |
|                      | sex                                | 0.026 | 3.448  | 1.156             | 10.279 |
| <i>Phenobarbital</i> | T-P                                | 0.047 | 8.348  | 1.033             | 67.443 |

<sup>a</sup> only T-P and significant independent variables are shown. A-S, analgesics – sedatives; NICU, neonatal intensive care unit; T-P, time-point
